# Supplementary material for: Repurposing Potential of Riluzole as an ITAF Inhibitor in mTOR Therapy Resistant Glioblastoma
Source: Int J Mol Sci. 2020 Jan 5;21(1):344. doi: 10.3390/ijms21010344 (PMC6981868; doi:10.3390/ijms21010344)
Supplement: Supplementary file 1 [file ijms-21-00344-s001.zip › FDA approved cpd docking scores UP1 table S1.xlsx]

## Sheet: Sheet1
FDA approved drug	Docking score (kcal/mol)
Riluzole	-12.14
Cytarabine	-6.34
Altretamine	-5.81
Dimazole	-5.36
Etoposide	-4.76
Aciclovir	-3.98
Delavirdine	-3.74
Levamisole	-3.62
Pamidronate	-3.61
Reserpine	-3.52
Sufentanil	-3.51558
Ramelteon	-3.51423
Etomidate	-3.51397
Ticarcillin	-3.51042
Vildagliptin	-3.51032
Ethoxzolamide	-3.50258
Ritonavir_C	-3.50078
Phenazopyridine	-3.50045
Eplerenone_C	-3.49858
Oxandrolone_C	-3.49817
Ramipril	-3.49757
Metocurine	-3.49504
Metolazone	-3.49084
Eplerenone_Iso	-3.48939
Cisapride	-3.48891
Telbivudine	-3.48876
Olanzapine	-3.48795
Penicillamine	-3.48559
Nicotine	-3.4848
Nonoxynol-9	-3.47747
Clotiazepam	-3.47735
Esomeprazole	-3.47513
Ceftazidime_Iso	-3.47324
Salmeterol	-3.47267
Indapamide	-3.46934
Enflurane	-3.46859
Hydromorphone	-3.46644
Tamoxifen_Iso	-3.46614
Buserelin	-3.46426
Tamsulosin_Iso	-3.45919
Dabigatran_etexilate	-3.45559
Isosorbide_Mononitrate	-3.4503
Alfuzosin	-3.44922
Clomipramine	-3.4447
L-Lysine	-3.44328
Danazol	-3.44281
Cinitapride	-3.44281
Marimastat	-3.4422
Fosfomycin	-3.44065
Succimer	-3.43498
L-Glutamic_Acid	-3.43172
Thiamylal	-3.43086
Mazindol	-3.42648
Tretinoin	-3.42567
Meclofenamic_acid	-3.4236
Flutamide	-3.42146
Acetylsalicylic_acid	-3.4206
Pentobarbital	-3.42029
Panitumumab	-3.41997
Lercanidipine	-3.41162
Prednicarbate	-3.41108
Lisinopril_C	-3.41073
Guanfacine	-3.40995
Dyclonine	-3.4084
Prazosin	-3.40806
Desflurane	-3.40472
Dienestrol	-3.39898
Iohexol	-3.39787
Lovastatin	-3.39676
Adefovir_Dipivoxil	-3.39528
Amifostine	-3.39301
Donepezil	-3.38691
Olmesartan	-3.3869
Rifapentine	-3.37965
Phytonadione	-3.37963
Diphenhydramine	-3.37547
Clobetasol	-3.37073
Vancomycin_C	-3.37034
Promazine	-3.3691
Clozapine	-3.3675
Vitamin_A	-3.36719
Meticillin	-3.36216
Porfimer	-3.36041
Nepafenac	-3.36023
Digitoxin	-3.35815
Cefazolin	-3.35813
Desonide	-3.35559
Thioridazine	-3.35456
Chlorotrianisene	-3.35377
NADH	-3.34962
Sitagliptin	-3.34375
Granisetron	-3.34283
Ethosuximide	-3.33649
Tramadol	-3.336
Methotrimeprazine	-3.33312
Vidarabine	-3.32543
Grepafloxacin	-3.32457
Procarbazine	-3.31402
Clomifene	-3.308
Quinupristin	-3.29895
Mepivacaine	-3.29374
Lomustine	-3.29184
Posaconazole	-3.28975
Dextroamphetamine	-3.28895
Nimodipine	-3.28805
Mupirocin	-3.28627
Valaciclovir_C	-3.28604
Ifosfamide	-3.285
Aprepitant_C	-3.28448
Naphazoline	-3.28222
Pargyline	-3.28109
Rifaximin	-3.28094
Methoxamine	-3.28082
Methylphenobarbital	-3.27834
Josamycin	-3.27235
Nabilone_C	-3.2707
Tofisopam	-3.27037
Cefalotin_Iso	-3.27017
Lincomycin	-3.26994
Carvedilol	-3.26987
Dexfenfluramine	-3.26748
Raloxifene	-3.26338
Lisuride_C	-3.26063
Nilotinib	-3.25796
Halofantrine	-3.25294
Meropenem	-3.25096
Nicardipine	-3.2498
Sertraline	-3.24406
Levallorphan_Iso	-3.24403
Sulindac_Iso	-3.23831
Ticlopidine	-3.23791
Adenosine_monophosphate	-3.23772
Mefenamic_acid	-3.2368
Chloroprocaine	-3.23279
Mephenytoin	-3.23256
Ouabain	-3.23187
Tazobactam	-3.22951
Zafirlukast	-3.22886
Exemestane	-3.22851
Ipratropium_bromide	-3.22732
Mirtazapine	-3.22516
Fosamprenavir	-3.22236
Liothyronine	-3.22179
Quinine_C	-3.21996
Cloxacillin	-3.21921
Ergocalciferol	-3.21765
Echothiophate	-3.21563
Nitrazepam	-3.21292
Amlexanox	-3.21238
Dasatinib	-3.20681
Sulfacetamide	-3.20534
Ambenonium	-3.20099
Diloxanide	-3.20087
Loracarbef_Iso	-3.19907
Tocainide	-3.19742
Paliperidone	-3.19578
Metixene	-3.19569
Gatifloxacin	-3.19556
Stavudine_Iso	-3.18716
Methocarbamol	-3.18652
Loracarbef_C	-3.18557
Dihydroxyaluminium	-3.18492
Meloxicam	-3.18448
Acarbose	-3.18377
Sertaconazole	-3.18303
Atomoxetine	-3.17451
Maraviroc	-3.17418
Lansoprazole	-3.17348
Vitamin_E	-3.17217
Aminosalicylic_Acid	-3.1644
Metoclopramide	-3.16157
Tadalafil	-3.1585
Lisinopril_Iso	-3.15754
Suramin	-3.15404
Drotaverine	-3.14788
Oseltamivir	-3.14656
Atovaquone	-3.14391
Monobenzone	-3.14286
Isradipine	-3.14147
Nicergoline_Iso	-3.14106
Mycophenolic_acid	-3.14048
Guanabenz_Iso	-3.13968
Sulfoxone	-3.13803
Venlafaxine	-3.13762
Telaprevir	-3.13744
Glimepiride	-3.13742
Leucovorin	-3.13352
Tacrolimus	-3.13201
Cefamandole	-3.1291
Azathioprine	-3.12536
Ketorolac	-3.12433
Isotretinoin	-3.11957
Mometasone	-3.11939
Valaciclovir_Iso	-3.11863
Dolasetron	-3.11849
Levodopa	-3.11756
Trichlormethiazide	-3.11489
Omeprazole	-3.11293
Niclosamide	-3.10476
Ibudilast	-3.10433
Amikacin_Iso	-3.09945
Fluoxymesterone	-3.09825
Dichlorphenamide	-3.09269
Tamoxifen_C	-3.08963
Toremifene_Iso	-3.088
Rizatriptan	-3.08778
Nafcillin_C	-3.08696
Phenformin	-3.08306
Trospium	-3.07844
Indomethacin	-3.07745
Chlorpromazine	-3.07204
Rasagiline	-3.07056
Cefdinir_C	-3.06846
Vapreotide	-3.06845
Nilutamide	-3.06786
Felbamate	-3.06693
Tolazoline	-3.06674
Candesartan	-3.06442
Silver_sulfadiazine	-3.06236
Naltrexone_Iso	-3.06067
Cefpiramide_C	-3.05814
Vancomycin_Iso	-3.05776
Topotecan	-3.05732
Cerulenin	-3.05461
Levallorphan_C	-3.05011
Methylscopolamine_C	-3.04721
Iodixanol	-3.0465
Buclizine	-3.04055
Cephaloglycin_C	-3.03608
Hexobarbital	-3.03207
Fenoprofen	-3.03145
Flupenthixol	-3.02957
Diethylcarbamazine	-3.0241
Atenolol	-3.02407
Daunorubicin_Iso	-3.02229
Nevirapine	-3.02016
Estrone_C	-3.02013
Bisoprolol	-3.0183
Bexarotene	-3.01518
L-Valine	-3.01487
Butethal	-3.0142
Fludarabine	-3.01224
Antrafenine	-3.01195
Desvenlafaxine	-3.01091
Dapiprazole	-3.00373
Perphenazine	-3.00271
Netilmicin	-3.00214
Mesalazine	-3.00043
Chlorthalidone	-3.00033
Vindesine	-2.99775
Latamoxef	-2.9975
Duloxetine_C	-2.99288
Disulfiram	-2.99256
Prochlorperazine	-2.98811
Medroxyprogesterone_Iso	-2.98715
Aminolevulinic_acid	-2.98284
Oxacillin_C	-2.98032
Alprostadil	-2.98016
Fluvoxamine	-2.97968
Ciclopirox	-2.97762
Levonorgestrel	-2.97585
Pancuronium	-2.97574
Exenatide	-2.97218
Oxaprozin	-2.96946
Plerixafor	-2.9671
Bambuterol	-2.96636
Phenylbutazone	-2.9653
Metocurine_Iodide	-2.96178
Novobiocin	-2.96047
Nebivolol	-2.94666
Nitrofurantoin_Iso	-2.94322
Dibucaine	-2.94297
Methacholine	-2.94245
Enoxacin	-2.93979
Quinestrol	-2.93942
Riboflavin	-2.93389
Fluticasone_Propionate_C	-2.93077
Sulfamethoxazole	-2.92924
Triazolam	-2.9243
Benzquinamide	-2.924
Solifenacin	-2.92301
Demeclocycline_Iso	-2.91984
Desipramine	-2.9186
Captopril	-2.91434
Capreomycin	-2.91414
Carbenicillin_Iso	-2.91397
Idarubicin	-2.91313
Oxaliplatin_C	-2.91199
Nisoldipine	-2.90918
Chloramphenicol_Iso	-2.90742
L-Methionine	-2.90351
Betahistine	-2.89737
Aripiprazole	-2.8966
Aliskiren	-2.89593
Penbutolol	-2.89564
Amikacin_C	-2.89526
Practolol	-2.89382
Aluminum_hydroxide	-2.89237
Kanamycin	-2.89234
Alvimopan	-2.89234
Gadobutrol	-2.8902
Physostigmine	-2.88779
Levonordefrin	-2.88219
Nabilone_Iso	-2.88193
Raltitrexed	-2.88067
Amphotericin_B_Iso	-2.88054
Amlodipine	-2.87602
Finasteride	-2.87359
L-Citrulline	-2.87249
Ritonavir_Iso	-2.86538
Erlotinib	-2.86529
Cefprozil	-2.86376
Formoterol	-2.86167
Metronidazole	-2.85878
Galantamine_Iso	-2.85759
Pentamidine	-2.85702
Miglustat_C	-2.85603
Pirbuterol	-2.8547
Darunavir	-2.85273
Gabapentin	-2.85198
Fesoterodine	-2.84882
Mivacurium	-2.8476
Nitrofurantoin_C	-2.84733
Gallium_nitrate	-2.84439
Cefacetrile	-2.84265
Sulpiride	-2.84007
Daunorubicin_C	-2.83855
Benzatropine	-2.83506
Ampicillin	-2.83139
Prilocaine	-2.8307
Roxatidine_acetate	-2.82655
Lamivudine_C	-2.81531
Cyproterone	-2.81082
Docetaxel	-2.81016
Guaifenesin	-2.81014
Oxamniquine	-2.80999
Repaglinide	-2.80907
Guanethidine	-2.80698
Isopropamide	-2.80499
Pentostatin_C	-2.80301
Minocycline	-2.80283
Glutathione	-2.80266
Propylhexedrine	-2.8
imiquimod	-2.79779
Orciprenaline	-2.7961
Propoxyphene_C	-2.79408
Epinephrine_C	-2.78878
Naftifine	-2.78646
Nandrolone_phenpropionate	-2.78421
Diphenoxylate	-2.78394
Galsulfase	-2.78184
Anagrelide	-2.78026
Flumazenil	-2.77928
Pyridostigmine	-2.77773
Colchicine	-2.77516
Miglitol	-2.77312
Zanamivir_Iso	-2.77283
Paromomycin	-2.77029
Cocaine	-2.7681
Amrinone	-2.76529
Terazosin	-2.76414
Clemastine	-2.76285
Chlorpheniramine	-2.7607
Zileuton	-2.75665
Dihydrotachysterol	-2.74984
Tymazoline	-2.74973
Dimethindene	-2.74699
Aminophenazone	-2.73643
Chlordiazepoxide	-2.73399
Trimipramine	-2.73335
Thymalfasin	-2.73327
Theobromine	-2.73279
Chloramphenicol_C	-2.73263
Celecoxib	-2.72925
Acebutolol	-2.72911
Lenalidomide	-2.72869
Galantamine_C	-2.7285
Bortezomib	-2.72819
Idoxuridine	-2.7278
Promethazine	-2.72561
Amoxicillin	-2.72554
Minoxidil	-2.71962
Iodipamide	-2.71956
Triamterene	-2.71849
Demeclocycline_C	-2.71404
Proflavine	-2.71003
Vinblastine_Iso	-2.70734
Tenoxicam	-2.69713
Simvastatin_C	-2.69562
Estazolam	-2.69356
Streptozocin_C	-2.69274
Diphenidol	-2.69017
Bacampicillin	-2.68964
Trabectedin	-2.6892
Pentoxifylline	-2.68477
Chloropyramine	-2.67764
Paramethadione	-2.67329
Nalbuphine	-2.67024
Cefdinir_Iso	-2.66848
Brinzolamide	-2.66413
Travoprost	-2.66287
Tirofiban	-2.66056
Mefloquine	-2.65978
Pemetrexed_Iso	-2.65308
Verapamil	-2.65212
Carbinoxamine	-2.64617
Sildenafil	-2.6458
Trimeprazine	-2.63886
Clofibrate	-2.63726
Pioglitazone	-2.6341
Magnesium_oxide	-2.63184
Aceprometazine	-2.62975
Gemifloxacin	-2.62858
Salicylamide	-2.62698
Arformoterol	-2.62474
Drostanolone	-2.62379
Ibuprofen	-2.61955
Glyburide	-2.61571
Dexmedetomidine_Iso	-2.61508
Cyclophosphamide	-2.60773
Oxybuprocaine	-2.60728
Labetalol	-2.60632
Theophylline	-2.60507
Isometheptene	-2.60492
L-Tryptophan	-2.60477
Lucanthone	-2.59692
Scopolamine	-2.59594
Flunisolide	-2.59024
Xanthophyll	-2.58405
Almitrine	-2.58372
Famotidine	-2.58075
Efavirenz_C	-2.57927
Picrotoxin_Iso	-2.57451
Reboxetine	-2.56902
Levorphanol	-2.56901
Diflunisal	-2.56792
Haloprogin	-2.56584
Oxprenolol	-2.56249
Phenprocoumon	-2.56171
Rosuvastatin	-2.5613
Phenacemide	-2.55786
Sirolimus	-2.54962
Sumatriptan	-2.54595
Protriptyline	-2.54543
Estramustine	-2.54268
Cefonicid	-2.54164
Methimazole	-2.54144
Anisindione	-2.54108
Homatropine_Methylbromide	-2.53787
Tiludronate	-2.53668
Metoprolol	-2.53585
Oxytetracycline_Iso	-2.53183
Azacitidine	-2.52306
Norfloxacin	-2.52091
Oxymetazoline	-2.5206
Metaraminol_Iso	-2.51748
Bupropion	-2.51588
Dexamethasone	-2.51442
Tranexamic_Acid	-2.51334
Chlorprothixene	-2.51177
Penciclovir	-2.50987
Fulvestrant	-2.50987
Cefalotin_C	-2.50655
Tobramycin_Iso	-2.50585
Decitabine	-2.50558
Tridihexethyl	-2.5037
Trimethobenzamide	-2.50357
Zolmitriptan	-2.50346
Eculizumab	-2.50192
Quinapril	-2.50022
Cefmetazole	-2.49878
Cefditoren	-2.49244
Benzyl_Benzoate	-2.49243
Flurbiprofen	-2.49173
Pentolinium	-2.49039
Trihexyphenidyl	-2.48899
Ethchlorvynol	-2.48293
Triflupromazine	-2.47809
Thiamine	-2.47479
Nandrolone_decanoate	-2.47315
Torasemide	-2.47281
N-Acetyl-D-glucosamine	-2.46817
Prasugrel	-2.46788
Frovatriptan	-2.46278
Magnesium_salicylate	-2.46144
Stepronin	-2.4603
Cefotetan	-2.4565
Cholecalciferol	-2.45248
Primidone	-2.44731
Varenicline	-2.44694
Guanidine	-2.44251
Leflunomide	-2.43981
Phenylpropanolamine	-2.43933
Betaxolol	-2.4367
Spectinomycin	-2.43463
Etonogestrel	-2.43442
Guanadrel_Sulfate	-2.43426
Codeine	-2.43413
Bepridil	-2.43289
Halazepam	-2.43201
Buprenorphine	-2.41763
Oxiconazole	-2.41731
Hydrochlorothiazide	-2.41447
Ranitidine	-2.40277
Isoetharine	-2.40174
Cilastatin	-2.40089
Nilvadipine	-2.39956
Milnacipran	-2.39652
Insulin_Glulisine	-2.38904
Ursodeoxycholic_acid	-2.38395
Nifedipine	-2.38261
Chlorphenesin	-2.37948
Molindone	-2.37604
Uracil_mustard	-2.37516
Moricizine	-2.36956
Acetic_acid	-2.36787
Isocarboxazid	-2.36728
Butenafine	-2.3667
Podofilox	-2.36621
Pentosan_Polysulfate_C	-2.36468
Glisoxepide	-2.36347
Sulfamerazine	-2.35475
Cryptenamine	-2.35257
Naltrexone_C	-2.35222
Itraconazole	-2.34373
Malathion	-2.34316
Isosorbide_Dinitrate	-2.34089
Polystyrene_sulfonate	-2.33875
Dextrothyroxine_C	-2.33775
Methantheline	-2.33388
Fenofibrate	-2.32859
Adenosine_Iso	-2.32694
Terlipressin	-2.32672
Doxacurium_chloride	-2.3263
Ranolazine	-2.31697
Dihydroergotoxine	-2.31494
Hydrocodone	-2.31439
Ergotamine_C	-2.31361
Permethrin	-2.31248
Phenytoin	-2.31051
Ceftazidime_C	-2.30654
Tranylcypromine	-2.29717
Thiothixene	-2.29165
Roxithromycin	-2.29053
Flucytosine	-2.28905
Thiotepa	-2.28893
Furosemide	-2.28892
Clotrimazole	-2.28788
Clofazimine	-2.28527
Diazepam	-2.27989
Carphenazine	-2.27675
Dihydroergotamine	-2.27668
Lumiracoxib	-2.2758
Candoxatril_C	-2.27535
Talbutal	-2.27414
Saxagliptin	-2.27394
Isoproterenol	-2.27307
Clodronate	-2.27205
Arbutamine	-2.27112
Azlocillin	-2.27007
Chenodeoxycholic_acid	-2.26761
Sulfacytine	-2.26499
Propofol	-2.2638
Auranofin	-2.26312
Benzonatate	-2.26027
Phenoxybenzamine	-2.25926
Methoxsalen	-2.25719
Naproxen	-2.25614
Everolimus	-2.25338
Brimonidine	-2.25147
Pralidoxime	-2.25125
Fluvastatin	-2.24579
Edrophonium	-2.24443
Fludiazepam	-2.24421
Testosterone_Iso	-2.24318
Thiopental	-2.24202
Tetrahydrobiopterin	-2.24163
Moxifloxacin	-2.24118
Flumethasone_Pivalate_Iso	-2.23914
Rimonabant	-2.23566
Nateglinide	-2.23555
Levetiracetam	-2.23343
Piroxicam	-2.22966
Methadyl_Acetate	-2.22694
Ceruletide	-2.22661
Linezolid_Iso	-2.22287
Inulin_C	-2.22133
L-Carnitine_C	-2.21592
Bethanechol	-2.21518
Cefoperazone	-2.21398
Xylometazoline	-2.21359
Abatacept	-2.21146
Gliquidone	-2.20834
Ivermectin_C	-2.2055
Tolmetin	-2.20477
Stavudine_C	-2.20097
Spironolactone_Iso	-2.19743
Heptabarbital	-2.19558
Spironolactone	-2.19531
Stanozolol	-2.19364
Tafluprost	-2.19045
Plicamycin	-2.18422
Zopiclone	-2.18414
Hydroxychloroquine	-2.1787
Trifluoperazine	-2.17762
Ketoprofen	-2.17419
Amiloride	-2.17335
Aprindine	-2.17107
Risedronate	-2.17064
Mequitazine	-2.16899
Diethylstilbestrol	-2.16525
Dexmethylphenidate	-2.16423
Pindolol	-2.16322
Epoprostenol	-2.16027
Morphine	-2.15936
Benazepril_C	-2.15729
Baclofen	-2.15478
Cefotaxime_Iso	-2.14717
Piperacillin	-2.13729
Cyclopentolate	-2.1367
L-Cysteine	-2.13389
Nortriptyline	-2.13196
Anidulafungin	-2.12739
Tetracycline	-2.12466
Ranibizumab	-2.12283
Acetohexamide	-2.11884
Docosanol	-2.11799
Nitrofurazone	-2.1144
L-Aspartic_Acid	-2.10707
Levobunolol	-2.10428
Etodolac	-2.10142
Tipranavir	-2.09722
Cevimeline	-2.0969
Dinoprostone	-2.09687
Miglustat_Iso	-2.09658
Ergotamine_Iso	-2.09494
Spermine	-2.09423
Trimethaphan	-2.09301
Arsenic_trioxide	-2.09088
Gemfibrozil	-2.08772
Neostigmine	-2.08763
Pipobroman	-2.08293
Tamibarotene	-2.08043
Fluphenazine	-2.07245
Gadoversetamide	-2.07087
Cefadroxil	-2.07064
Timolol	-2.06674
Bethanidine	-2.06462
Gadoteridol	-2.06415
Saprisartan	-2.06401
Warfarin	-2.06206
Cefuroxime	-2.05919
Domperidone	-2.05155
Clobazam	-2.0434
Foscarnet	-2.04163
Vincristine_Iso	-2.0413
Entacapone_Iso	-2.03871
Rosoxacin	-2.03852
Cabazitaxel	-2.03572
Anileridine	-2.03383
Flurandrenolide	-2.03367
Chloroxine	-2.02884
Rivastigmine	-2.0242
Levothyroxine_C	-2.02263
Cycrimine	-2.02188
Mycophenolate_mofetil_Iso	-2.01968
Diltiazem	-2.01794
Ganciclovir	-2.01731
Vigabatrin	-2.01657
Oxcarbazepine	-2.01616
Trandolapril_Iso	-2.0065
Clofarabine_C	-2.00437
Acepromazine	-2.00384
Temsirolimus	-1.99973
Edetic_Acid	-1.99815
Apraclonidine	-1.99374
Niflumic_Acid	-1.99358
Sulfadiazine	-1.99223
Carbenicillin_C	-1.98927
Glutethimide	-1.98788
Sulfinpyrazone	-1.9809
Carteolol	-1.98065
Perindopril	-1.98065
Benchmark (I4A)	-1.98045
Candicidin	-1.97891
Methoxyflurane	-1.97849
Tobramycin_C	-1.97107
Budesonide	-1.96992
Diatrizoate	-1.95739
Lactulose_C	-1.95636
Clarithromycin	-1.95592
Fluconazole	-1.95335
Zuclopenthixol	-1.95133
Deserpidine	-1.94843
Propericiazine	-1.94674
Argatroban	-1.94532
Caspofungin_Iso	-1.9449
Loperamide	-1.94302
Amprenavir_C	-1.93997
Droperidol	-1.93975
Dipivefrin	-1.93408
Hydrocortamate	-1.93196
Oxaliplatin_Iso	-1.93193
Pimozide	-1.92935
Procaterol	-1.9293
Medrysone	-1.92864
Medroxyprogesterone_C	-1.92465
Pentagastrin	-1.91934
Choline	-1.91789
Gadodiamide	-1.91702
Vilazodone	-1.91573
Diphemanil_Methylsulfate	-1.91331
Halobetasol_Propionate_C	-1.91274
Metipranolol	-1.90747
Emedastine	-1.90737
Moexipril_Iso	-1.90517
Salsalate	-1.90213
Carboprost_Tromethamine_C	-1.90189
Brompheniramine	-1.9012
Aminocaproic_Acid	-1.90003
Palonosetron	-1.89754
Atropine_Iso	-1.89722
Cisplatin	-1.89561
Difluprednate	-1.89446
Cilostazol	-1.89343
Quinacrine	-1.89236
Indacaterol	-1.89043
Hesperetin	-1.88974
Sulfamethizole	-1.88562
Tenofovir	-1.88415
Eletriptan	-1.88033
Albendazole	-1.87973
Hydroflumethiazide	-1.87957
Caffeine	-1.8785
Indinavir	-1.8757
Dydrogesterone	-1.87495
Dimercaprol	-1.87384
Loratadine	-1.87293
Natamycin	-1.87253
Bimatoprost	-1.87252
Chlophedianol	-1.87232
Cefotaxime_C	-1.87189
Orlistat	-1.86255
L-Glutamine	-1.86157
Hexachlorophene	-1.86126
Ibandronate	-1.85765
Methyclothiazide	-1.85662
Ethinamate	-1.84871
Micafungin	-1.84713
Icatibant	-1.84462
Dextromethorphan_Iso	-1.84359
L-Tyrosine	-1.84204
Mimosine	-1.83921
Fexofenadine	-1.83857
gamma-Homolinolenic_acid	-1.83854
Pentazocine_Iso	-1.83362
Cyproheptadine	-1.82525
Dronabinol_Iso	-1.82513
Lapatinib	-1.82492
Nitroxoline	-1.82434
Diazoxide	-1.82406
Mecamylamine	-1.8231
Rocuronium	-1.82063
Carbamazepine	-1.82026
Diflorasone	-1.81983
Ergonovine	-1.8188
Oxycodone_Iso	-1.81836
Agomelatine	-1.81168
Methyprylon	-1.80698
Ertapenem	-1.8032
Flucloxacillin	-1.80245
Milrinone	-1.80094
Fluorescein	-1.80079
Alprazolam	-1.79933
Udenafil	-1.79667
Clonazepam	-1.79551
Methazolamide	-1.79412
Oxycodone_C	-1.79284
Cefaclor	-1.79109
Metyrosine	-1.78992
Phensuximide	-1.78313
Letrozole	-1.78202
Trimethoprim	-1.77817
Dantrolene	-1.77613
Triamcinolone_C	-1.77519
Amitriptyline	-1.7751
Sucralfate	-1.775
Atorvastatin	-1.77256
Prednisolone	-1.77212
Bismuth_Subsalicylate	-1.77153
Ivacaftor	-1.76927
Dimenhydrinate	-1.7682
Sertindole	-1.76417
Temazepam	-1.76167
Cephapirin	-1.76113
Mexiletine	-1.76064
Triprolidine_Iso	-1.75986
Escitalopram	-1.75936
Latanoprost_Iso	-1.75614
Cefpodoxime	-1.75456
Dextromethorphan_C	-1.75187
Tizanidine	-1.74766
Epirubicin_Iso	-1.74757
Ticagrelor	-1.74699
Probenecid	-1.74353
Valganciclovir	-1.74347
Bendroflumethiazide	-1.74081
Valsartan	-1.73781
Pramipexole	-1.73732
Sulfametopyrazine	-1.73491
Enprofylline	-1.73198
L-Histidine	-1.72855
Lubiprostone	-1.72806
Methyltestosterone	-1.71694
Cefixime_C	-1.71411
Modafinil	-1.71224
Phenylephrine	-1.7074
Amcinonide	-1.70459
Tetrabenazine	-1.70368
Trifluridine_C	-1.70272
Doxepin	-1.70175
Cinacalcet	-1.70081
Zidovudine_Iso	-1.6988
Hydroxocobalamin	-1.68963
Desoximetasone_C	-1.68955
Penicillin_V	-1.68948
Isothipendyl	-1.68305
Butalbital	-1.68269
Ethynodiol_Diacetate	-1.68054
Quazepam	-1.67863
Dicloxacillin_C	-1.67856
Procainamide	-1.67344
Phenobarbital	-1.67276
Oxandrolone_Iso	-1.66852
Midazolam	-1.66753
Methyl_aminolevulinate	-1.66716
Bretylium	-1.66208
Progabide	-1.66165
Pivampicillin	-1.65801
Deferasirox	-1.65788
Chlormezanone	-1.65743
Pranlukast	-1.65702
Treprostinil	-1.65661
Ridogrel	-1.65559
Mepenzolate	-1.65549
Nabumetone	-1.65122
Ciclesonide	-1.64936
Flumethasone_Pivalate_C	-1.6476
Ceftibuten	-1.64363
Cromoglicic_acid	-1.64208
Nystatin_Iso	-1.64068
Meprobamate	-1.63872
Calcitriol	-1.6376
Metrizamide	-1.63232
Nitroprusside	-1.62927
Cinalukast_C	-1.62883
Butoconazole	-1.62879
Ketamine	-1.62777
L-Alanine	-1.62635
Ezetimibe	-1.62591
Pyrimethamine	-1.62479
Azatadine	-1.62324
Cinolazepam	-1.62013
Phenindione	-1.61764
Cyanocobalamin	-1.61402
Gentian_Violet	-1.6138
Ethionamide	-1.61206
Olopatadine	-1.60954
Methylscopolamine_Iso	-1.60681
Flecainide	-1.60365
Paclitaxel	-1.60184
Hydroxystilbamidine_Isethionate	-1.60158
Dicloxacillin_Iso	-1.59767
Hexylcaine	-1.59664
Cortisone_acetate	-1.5929
Cisatracurium_Besylate_Iso	-1.59052
Ciprofloxacin	-1.58969
Dyphylline	-1.58947
Proparacaine	-1.58619
Papaverine	-1.58602
Clomocycline_C	-1.58589
Iron_Dextran	-1.58555
L-Serine	-1.58257
Insulin_Detemir	-1.5804
Cyclizine	-1.57937
Pemetrexed_C	-1.57873
Bleomycin	-1.57639
Lindane	-1.57525
Thioguanine	-1.57304
Furazolidone_Iso	-1.56762
Cephalexin_C	-1.5666
Probucol	-1.56379
Cidofovir	-1.55418
Methsuximide	-1.55266
Oxazepam	-1.55215
Levothyroxine_Iso	-1.55032
Perflutren	-1.54926
Retapamulin	-1.54831
Gestodene	-1.54641
Selenium_Sulfide	-1.54611
Suprofen	-1.54387
Gonadorelin	-1.53429
Propafenone	-1.53219
Secobarbital	-1.52653
Nitazoxanide	-1.52254
test	-1.52211
Trilostane	-1.52166
Darifenacin_Iso	-1.52063
Alprenolol	-1.51874
L-Leucine	-1.51723
Aminophylline	-1.51676
Lopinavir	-1.51626
Pimecrolimus	-1.5152
Norethindrone_C	-1.51438
Ixabepilone	-1.51273
Attapulgite	-1.5088
Oxacillin_Iso	-1.50334
Nelarabine	-1.5023
Aspartame	-1.50083
Nizatidine_Iso	-1.4995
Sulfadoxine	-1.49923
Chlorothiazide	-1.49796
Chlorambucil	-1.49788
Flunitrazepam	-1.49776
Ethacrynic_acid	-1.4952
L-Asparagine	-1.49382
Colesevelam	-1.49206
Glatiramer_Acetate	-1.48964
Dorzolamide	-1.48606
Triamcinolone_Iso	-1.48605
Picrotoxin_C	-1.4857
Gadobenate_Dimeglumine	-1.48494
Terfenadine	-1.48479
Cilazapril	-1.48407
Succinylcholine	-1.48282
Debrisoquin	-1.48268
Benzphetamine	-1.48253
Triflusal	-1.48136
Thalidomide	-1.4805
Bepotastine	-1.48029
Cisatracurium_Besylate_C	-1.47918
Chlorhexidine	-1.47826
Terbinafine	-1.47351
Rotigotine	-1.47012
Bromazepam	-1.46926
Pilocarpine	-1.4688
Phenindamine	-1.46561
Bacitracin	-1.46523
Tyloxapol	-1.46504
Enoxaparin	-1.46289
Eprosartan	-1.46077
Quinidine	-1.45538
Metformin	-1.45496
Oxyphencyclimine	-1.45484
Rosiglitazone	-1.45085
Trisalicylate-choline	-1.44979
Cetirizine	-1.44881
Ceftriaxone	-1.44616
Aminoglutethimide	-1.446
Demecarium	-1.44014
Cephaloglycin_Iso	-1.43134
Carprofen	-1.42882
Lipoic_Acid	-1.42693
Bromodiphenhydramine	-1.42497
Tolbutamide	-1.42384
Mitotane	-1.41919
Cephalexin_Iso	-1.41861
Spirapril	-1.41492
Rivaroxaban	-1.41346
Ceforanide	-1.41224
Testosterone_Propionate	-1.40998
Sulfamoxole	-1.40788
L-Phenylalanine	-1.40124
Desloratadine	-1.39675
Levosimendan	-1.39618
Cyclacillin	-1.39595
Benzylpenicilloyl_Polylysine	-1.38628
Ethylmorphine	-1.37035
Tioconazole	-1.36591
Acetaminophen	-1.36556
Griseofulvin	-1.35993
Methyldopa	-1.35743
Nystatin_C	-1.35686
Epinephrine_Iso	-1.35418
Sunitinib	-1.35401
Magnesium_Sulfate	-1.35317
Disopyramide	-1.34718
Fosaprepitant	-1.34526
Ergoloid_mesylate	-1.34264
Glucosamine	-1.34229
Caspofungin_C	-1.34219
Dalfopristin	-1.34073
Methamphetamine	-1.33673
Halobetasol_Propionate_Iso	-1.33586
Rabeprazole	-1.33582
Gentamicin	-1.33566
Dirithromycin	-1.33254
Piperazine	-1.3317
Nafarelin	-1.33124
Halothane	-1.32744
Nelfinavir	-1.32381
Deslanoside	-1.32371
Glycine	-1.31833
L-Proline	-1.31788
Prazepam	-1.3175
Duloxetine_Iso	-1.31687
Alizapride	-1.31585
Calcipotriol	-1.31299
Fosphenytoin	-1.31175
Acetyldigitoxin_C	-1.31044
Capecitabine	-1.30878
Diethylpropion	-1.30635
Sodium_stibogluconate	-1.30571
Oxybutynin	-1.30526
Megestrol	-1.30523
Valrubicin	-1.30146
Ritodrine	-1.29805
Ofloxacin	-1.29766
Pipecuronium	-1.29745
Anastrozole	-1.29745
Naratriptan	-1.29393
Lorazepam	-1.2938
Sitaxentan	-1.28313
Aprobarbital	-1.27798
L-Carnitine_Iso	-1.2777
Latanoprost_C	-1.27495
Trovafloxacin_Iso	-1.27196
Bupivacaine	-1.26733
Teniposide_C	-1.26668
Oxybenzone	-1.26411
Alpha-Linolenic_Acid	-1.26154
Sparfloxacin	-1.25649
Hetacillin	-1.25599
Amphetamine	-1.25324
Hydroxyurea	-1.25007
Tolazamide	-1.24903
Cyclobenzaprine	-1.24723
Zaleplon	-1.24651
Flunarizine	-1.24412
Adenine	-1.24196
Mesoridazine	-1.24136
Calcium_carbonate	-1.23711
Cinoxacin	-1.23439
Carmustine	-1.2317
Metaraminol_C	-1.23155
Clonidine	-1.23118
Methadone	-1.22995
Betamethasone_Iso	-1.22643
Floxuridine	-1.22612
Enalapril_C	-1.22239
Nalidixic_Acid	-1.22215
Pentostatin_Iso	-1.21693
Acetylcysteine	-1.21642
Zalcitabine	-1.21547
Tiotropium	-1.21467
Allylestrenol	-1.21304
Hydralazine	-1.2107
Benzocaine	-1.20808
Teniposide_Iso	-1.20726
Amisulpride	-1.20104
Yohimbine	-1.19764
Mannitol	-1.19528
Methotrexate_C	-1.19461
Vorinostat	-1.18169
Tolnaftate	-1.18122
Telithromycin	-1.17996
Voriconazole_Iso	-1.17838
Cimetidine	-1.17699
Bopindolol	-1.17096
Amprenavir_Iso	-1.16765
Ethopropazine	-1.16748
Phendimetrazine	-1.16524
Sevelamer	-1.15862
Amphotericin_B_C	-1.15774
Mercaptopurine	-1.15758
Levofloxacin	-1.155
Cladribine	-1.15108
Pentosan_Polysulfate_Iso	-1.15076
Rifampin	-1.15071
Entecavir_C	-1.14844
Menadione	-1.14737
Paricalcitol	-1.14732
Mechlorethamine	-1.14391
Nedocromil	-1.14282
Gadopentetate_dimeglumine	-1.1408
Nadolol	-1.14071
Sulindac_C	-1.14026
Ethanol	-1.13892
Mephentermine	-1.13887
Famciclovir	-1.13681
L-Ornithine	-1.13664
Ketazolam	-1.13512
L-Cystine	-1.13434
Primaquine	-1.13341
Bifonazole	-1.13222
Thiethylperazine	-1.12893
Mifepristone	-1.12777
Zolpidem	-1.12358
Mestranol	-1.12103
Lidocaine	-1.121
Paramethasone	-1.12027
Framycetin_Iso	-1.11791
Masoprocol	-1.11543
Cefoxitin	-1.10668
Cinalukast_Iso	-1.10426
Procaine	-1.1017
Nitisinone	-1.10169
Topiramate	-1.10064
Gallamine_Triethiodide	-1.0996
Mezlocillin	-1.09272
Chlormerodrin	-1.09162
Gliclazide	-1.08375
Dactinomycin	-1.07576
Glipizide	-1.07285
Trazodone	-1.07035
Allopurinol	-1.07031
Oxyphenonium	-1.06824
Clenbuterol	-1.06484
Cefepime	-1.06322
Progesterone	-1.06316
Alclometasone	-1.06226
Methotrexate_Iso	-1.06149
Cefpiramide_Iso	-1.06138
Epinastine	-1.06067
Imipramine	-1.05998
Triprolidine_C	-1.05831
Clorazepate	-1.05669
Isoflurophate	-1.05647
Toremifene_C	-1.05554
Cycloserine	-1.05333
Crotamiton	-1.04918
Propiomazine	-1.04331
Atazanavir	-1.04113
Sulfapyridine	-1.03758
Amodiaquine	-1.02707
Neomycin	-1.02346
Alosetron	-1.02017
Tiaprofenic_acid	-1.01808
Atropine_C	-1.01398
Atracurium	-1.01353
Salbutamol	-1.01344
Fleroxacin	-1.0134
Carbidopa	-1.01
Ardeparin	-1.00087
Dinoprost_Tromethamine	-0.999987
Degarelix	-0.998209
Desogestrel	-0.990666
Fospropofol	-0.989899
Risperidone	-0.988179
Mecasermin	-0.987519
Tasosartan	-0.985717
Didanosine	-0.979501
Butorphanol_Iso	-0.97784
Amantadine	-0.976092
Amyl_Nitrite	-0.974331
Colistin	-0.973536
Carbetocin	-0.973303
Dipyridamole	-0.970182
Norelgestromin	-0.962519
Temozolomide	-0.959888
Sevoflurane	-0.959601
Ammonium_lactate	-0.956226
Ecabet	-0.956218
Testolactone	-0.952229
Doxazosin	-0.952026
L-Threonine	-0.951109
Buspirone	-0.949255
Montelukast_C	-0.948826
Aminohippurate	-0.948771
Adenosine_C	-0.947066
Vitamin_C	-0.942317
Prednisone	-0.939258
Epirubicin_C	-0.9388
Vardenafil	-0.93732
Biotin	-0.937044
Voglibose	-0.936831
Liotrix	-0.926614
Clindamycin	-0.92323
Fentanyl	-0.922853
Fluoxetine	-0.92216
Methylphenidate	-0.920914
Mitoxantrone	-0.920514
Verteporfin_C	-0.920363
Dexbrompheniramine	-0.916085
Dofetilide	-0.914341
Alendronate	-0.912925
Mianserin	-0.908752
Kaolin	-0.908746
Diphenylpyraline	-0.906592
Bezafibrate	-0.904
Felodipine	-0.902286
Loxapine	-0.899691
Polythiazide	-0.898709
Estrone_Iso	-0.89322
Ziprasidone	-0.890259
Norgestimate	-0.889295
Icosapent	-0.888717
Tropicamide	-0.888227
Astemizole	-0.881686
Remikiren	-0.880781
Sodium_bicarbonate	-0.879749
Menthol	-0.878544
Erythrityl_Tetranitrate	-0.872861
Benzthiazide	-0.87269
Chloroquine	-0.871354
Pefloxacin	-0.862508
Ropivacaine	-0.861714
Dicumarol	-0.861291
Adapalene	-0.859432
Rimexolone	-0.857027
Lisdexamfetamine	-0.854008
Moexipril_C	-0.853933
Amobarbital	-0.848838
Ethiodized_oil	-0.84769
Dexmedetomidine_C	-0.843018
Mebendazole	-0.841836
Remoxipride	-0.83994
Imatinib	-0.835873
Propantheline	-0.835607
Calcium_Acetate	-0.833307
Gefitinib	-0.831967
Isoflurane	-0.830864
Hyoscyamine_C	-0.827988
Fomepizole	-0.825328
Bosentan	-0.825028
L-Arginine	-0.821092
Tacrine	-0.819616
Vincristine_C	-0.816957
Citalopram	-0.81251
Doxorubicin	-0.811537
Decamethonium	-0.811481
Carbimazole	-0.810889
Acenocoumarol	-0.810473
Doxapram	-0.810336
Hyoscyamine_Iso	-0.809007
Trimethadione	-0.807075
Carglumic_acid	-0.806617
Calcidiol	-0.804744
Haloperidol	-0.803117
Lamotrigine	-0.800929
Fusidic_Acid	-0.800548
Maprotiline	-0.79331
Sulfisoxazole	-0.792567
Glycopyrrolate	-0.79146
Artemether	-0.790073
Ephedra	-0.788721
Quetiapine	-0.788399
Hydroxyzine	-0.787825
Amsacrine	-0.787468
Deferoxamine	-0.786846
Bromocriptine	-0.781231
Pyrazinamide	-0.780703
Lactulose_Iso	-0.775854
Acetophenazine	-0.773183
Ondansetron	-0.772805
Pipotiazine	-0.770436
Ceftizoxime	-0.769084
Mepyramine	-0.767909
Telmisartan	-0.76762
Acetohydroxamic_Acid	-0.767392
Lymecycline	-0.767003
Tiagabine	-0.764346
Quinidine_barbiturate	-0.761333
Anisotropine_Methylbromide_Iso	-0.759451
Sulfasalazine	-0.757799
Dimethyl_sulfoxide	-0.757356
Phosphatidylserine	-0.746521
Enoximone	-0.746128
Acamprosate	-0.737753
Clavulanate	-0.737353
Linezolid_C	-0.732489
Rolitetracycline	-0.730668
Remifentanil	-0.72816
Estradiol	-0.726235
Creatine	-0.723937
Tolterodine	-0.721251
Valproic_Acid	-0.720614
Fludrocortisone_C	-0.718621
Proguanil	-0.717873
Acetazolamide	-0.717208
Azidocillin	-0.711082
Amdinocillin	-0.710733
Streptozocin_Iso	-0.70977
Busulfan	-0.70954
Tripelennamine	-0.706639
Bicalutamide	-0.705708
Inulin_Iso	-0.699782
Dopamine	-0.698799
Furazolidone_C	-0.698342
Alitretinoin_Iso	-0.695358
Misoprostol	-0.693035
Cyclandelate	-0.688312
Olsalazine	-0.687576
Beclometasone_dipropionate	-0.683111
Ketotifen	-0.671462
Amiodarone	-0.668878
Gemcitabine_C	-0.662385
Propoxyphene_Iso	-0.661944
Fluocinolone_Acetonide_Iso	-0.658915
Cefmenoxime	-0.655993
Lornoxicam	-0.655141
Adenosine_triphosphate	-0.653535
Dexrazoxane	-0.650087
Colestipol	-0.64846
Voriconazole_C	-0.64801
Pipazethate	-0.647479
Zidovudine_C	-0.639012
Tolcapone	-0.637644
Imipenem	-0.637536
Irbesartan	-0.634124
Ribavirin	-0.632453
Dicyclomine	-0.630601
Phenmetrazine	-0.62681
Nicergoline_C	-0.622818
Pantoprazole	-0.621328
Cabergoline	-0.61818
Meperidine	-0.616674
Trandolapril_C	-0.610898
Tigecycline_C	-0.608474
Sibutramine	-0.605672
Metyrapone	-0.602238
Midodrine	-0.602118
Hexafluronium	-0.59987
Sulfanilamide	-0.596328
Emtricitabine	-0.595826
Oxytetracycline_C	-0.593783
Methohexital	-0.593156
Apomorphine_Iso	-0.591859
Clopidogrel	-0.587028
Histamine_Phosphate	-0.586809
Cefixime_Iso	-0.586537
Clofarabine_Iso	-0.585881
Nitrendipine	-0.584796
Levobupivacaine	-0.582532
Tetrahydrofolic_acid	-0.581542
Ivermectin_Iso	-0.57768
Procyclidine	-0.576278
Candoxatril_Iso	-0.574549
Bevantolol	-0.574286
Aztreonam	-0.572669
Carbachol	-0.570077
Alcaftadine	-0.565716
Pseudoephedrine	-0.559195
Lamivudine_Iso	-0.557803
Fosinopril_C	-0.556035
Pentazocine_C	-0.553513
Forasartan	-0.546949
Erythromycin	-0.545058
Fosinopril_Iso	-0.541164
Iloprost	-0.540636
Sulfathiazole	-0.539703
Lisuride_Iso	-0.538542
Lofexidine	-0.537702
Praziquantel	-0.537118
Fencamfamine	-0.536914
Econazole	-0.536909
Enalapril_Iso	-0.535953
Selegiline	-0.529017
Montelukast_Iso	-0.521396
Dapsone	-0.520118
Bentiromide	-0.518559
Oxtriphylline	-0.517692
Amoxapine	-0.51726
Fluorouracil	-0.516236
Fenoldopam	-0.51566
Biperiden	-0.514327
Pemirolast	-0.513585
Etoricoxib	-0.510102
Indecainide	-0.506028
Methylergonovine	-0.501245
Betamethasone_C	-0.487968
Mycophenolate_mofetil_C	-0.486675
Quinine_Iso	-0.486601
Vinblastine_C	-0.480637
Fluspirilene	-0.480371
Carboplatin	-0.479175
Benazepril_Iso	-0.476404
Trimetrexate	-0.476287
Propylthiouracil	-0.47387
Desoximetasone_Iso	-0.473695
Methdilazine	-0.473388
Troleandomycin	-0.472268
Methacycline	-0.466076
Gemcitabine_Iso	-0.465611
Calcium_Gluceptate	-0.461818
Carboprost_Tromethamine_Iso	-0.461521
Dacarbazine	-0.456736
Nafcillin_Iso	-0.453895
Chlorpropamide	-0.45143
Isoniazid	-0.448824
Acetyldigitoxin_Iso	-0.445473
Clidinium	-0.437696
Salicylate-sodium	-0.436506
Sulfadimethoxine	-0.43056
Azelastine	-0.429864
Dronabinol_C	-0.426595
Folic_Acid	-0.426144
Ephedrine	-0.424872
Carisoprodol	-0.424724
Doxycycline	-0.422376
Simvastatin_Iso	-0.418638
Tinidazole	-0.41583
Diclofenac	-0.413183
L-Isoleucine	-0.412803
Miconazole	-0.412035
Cinnarizine_C	-0.411337
Acitretin_Iso	-0.408261
Dezocine	-0.407978
Cinnarizine_Iso	-0.403865
Ibutilide	-0.402597
Dobutamine	-0.400591
Pravastatin	-0.399402
Ropinirole	-0.398669
Nitroglycerin	-0.39717
Alverine	-0.39715
Fluocinolone_Acetonide_C	-0.396254
Entacapone_C	-0.391604
Eszopiclone	-0.3892
Drospirenone	-0.388884
Methysergide	-0.387662
Testosterone_C	-0.387214
Conivaptan	-0.385592
Lumefantrine	-0.378051
Estropipate	-0.377381
Sulfaphenazole	-0.373731
Ajmaline	-0.373647
Arbekacin	-0.368828
Dextrothyroxine_Iso	-0.368014
Propranolol	-0.367479
Rifabutin_C	-0.36737
Irinotecan	-0.367261
Adinazolam	-0.364426
Antipyrine	-0.36213
Pirenzepine	-0.361918
Nizatidine_C	-0.359555
Thiabendazole	-0.359009
Levocabastine	-0.358803
Clocortolone	-0.356616
Rescinnamine	-0.356518
Clomocycline_Iso	-0.35628
Zonisamide	-0.355477
Digoxin	-0.353056
Methylprednisolone	-0.350901
Tamsulosin_C	-0.346043
Guanabenz_C	-0.345074
Zanamivir_C	-0.343563
Droxidopa	-0.343314
Saquinavir	-0.342038
Lomefloxacin	-0.334988
Heparin	-0.333759
Succinic_acid	-0.331322
Paroxetine_Iso	-0.329368
Cefotiam	-0.327337
Antazoline	-0.319928
S-Adenosylmethionine	-0.319645
Fenoterol	-0.318473
Sotalol	-0.31678
Levomethadyl_Acetate	-0.311074
Flurazepam	-0.306045
Metharbital	-0.304843
Pyruvic_acid	-0.299573
Penicillin_G	-0.298283
Chlorzoxazone	-0.298013
Quinethazone	-0.29797
Thioproperazine	-0.29791
Bumetanide	-0.29475
Abacavir	-0.291335
Pyridoxal	-0.286777
Ethambutol	-0.283651
Phentermine	-0.281638
Cyclothiazide	-0.281177
Pegaptanib	-0.277822
Conjugated_Estrogens	-0.275642
Azelaic_Acid	-0.271458
Niacin	-0.267692
Pregabalin	-0.263603
Fluorometholone	-0.259541
Tigecycline_Iso	-0.254519
Estriol	-0.253137
Ketoconazole	-0.252187
Darifenacin_C	-0.252102
Memantine	-0.250925
Pivmecillinam	-0.249831
Entecavir_Iso	-0.249573
Vecuronium	-0.248178
Alitretinoin_C	-0.247953
Norethindrone_Iso	-0.246181
Iophendylate	-0.24483
Efavirenz_Iso	-0.244749
Rimantadine	-0.242141
Terbutaline	-0.227142
Oxymorphone	-0.226944
Ethanolamine_Oleate	-0.225827
Oxitriptan	-0.220715
Perhexiline	-0.220598
Almotriptan	-0.219216
Alfentanil	-0.219176
Norepinephrine	-0.219017
Trifluridine_Iso	-0.218038
Hydroxypropyl_cellulose	-0.217343
Betazole	-0.214022
Orphenadrine	-0.208073
Hydrocortisone	-0.207066
Meclizine	-0.202064
Ximelagatran	-0.201964
Pyridoxine	-0.201864
Tazarotene	-0.197057
Nefazodone	-0.19663
Fluticasone_Propionate_Iso	-0.195989
Tubocurarine	-0.194739
Phentolamine	-0.192528
Etidronic_acid	-0.191057
Metaxalone	-0.18905
Fluocinonide	-0.188284
Pheniramine	-0.18488
Naloxone	-0.184225
Loteprednol	-0.184101
Streptomycin	-0.183756
Vinorelbine	-0.182346
Encainide	-0.181608
Butorphanol_C	-0.17841
Zoledronate	-0.177779
Salicyclic_acid	-0.176636
Losartan	-0.170436
Verteporfin_Iso	-0.168745
Acitretin_C	-0.168494
Balsalazide	-0.167058
Trovafloxacin_C	-0.164946
Doxylamine	-0.164509
Paroxetine_C	-0.163507
Framycetin_C	-0.162692
Trioxsalen	-0.161729
Cefradine	-0.159508
Esmolol	-0.155545
Ethinyl_Estradiol	-0.152725
Anisotropine_Methylbromide_C	-0.151645
Dutasteride	-0.147998
Azithromycin	-0.144604
Apomorphine_C	-0.143655
nitric_oxide	-0.141977
Pergolide	-0.13953
Mitomycin	-0.135538
Moclobemide	-0.134395
Mitiglinide	-0.128391
Bromfenac	-0.123709
Aprepitant_Iso	-0.122245
Sorafenib	-0.120705
Flavoxate	-0.120404
Melatonin	-0.117401
Melphalan	-0.115666
Minaprine	-0.112258
Ethotoin	-0.110202
Glycodiazine	-0.109434
Butabarbital	-0.107747
Fludrocortisone_Iso	-0.105183
Terconazole	-0.104015
Alfacalcidol	-0.102492
Fondaparinux_sodium_C	-0.101507
Bupranolol	-0.101367
Cysteamine	-0.101018
