# Supplementary material for: Repurposing Potential of Riluzole as an ITAF Inhibitor in mTOR Therapy Resistant Glioblastoma
Source: Int J Mol Sci. 2020 Jan 5;21(1):344. doi: 10.3390/ijms21010344 (PMC6981868; doi:10.3390/ijms21010344)
Supplement: Supplementary file 1 [file ijms-21-00344-s001.zip › Top 10 FDA approved ligands table S2.xlsx]

## Sheet: Sheet1
Ranking	FDA approved drug	Docking score (kcal/mol)	commercial availability	% IRES inhibition (50 nM @48 h; 293T)	FDA approved uses
1	riluzole	-12.14	yes	CCND1, 91.2; c-MYC, 93.7	approved to treat amyotrophic lateral sclerosis
2	cytarabine	-6.34	yes	CCND1, 5.2; c-MYC, 3.9	chemotherapeutic; antimetabolite approved to treat acute myeloid leukemia, acute lymphoblastic leukemia and chronic myeloid leukemia.
3	altretamine	-5.81	yes	CCND1, 4.6; c-MYC, 3.5	chemotherapeutic; alkylating agent, approved to treat ovarian cancer
4	dimazole	-5.36	no	ND	antifungal
5	etoposide	-4.76	yes	CCND1, 4.4; c-MYC, 4.1	chemotherpeutic; complexes with topoisomerase II and DNA to inhibit DNA repair
6	aciclovir	-3.98	yes	CCND1, 2.6; c-MYC, 1.9	antiviral; antimetabolite, approved to treat herpes labialis
7	delavirdine	-3.74	yes	CCND1, 4.7; c-MYC, 1.6	antiviral; reverse transcriptase inhibitor specific for HIV-1
8	levamisole	-3.62	no	ND	antihelminthic; approved to treat colon cancer
9	pamidronate	-3.61	yes	CCND1, 5.1; c-MYC, 2.2	bisphosphonate; approved to treat hypercalcemia and multiple myeloma
10	reserpine	-3.52	yes	CCND1, 3.4; c-MYC 4.6	alkaloid; approved to treat hypertension
